# Supplementary material for: Efficient DNA sequence compression with neural networks
Source: PubMed Central journal article supplement (PMC7657843; doi:10.1093/gigascience/giaa119), 2020-11-11
Supplement: giaa119_response_to_reviewer_comments_original_submission.pdf [file giaa119_response_to_reviewer_comments_original_submission.pdf]

## Author's Response To Reviewer Comments

Close

Thank you for the opportunity to revise the manuscript.  
The answers to reviewers are included in the attached file GeCo3\_Answers.pdf.  
As suggested by the editor we have also included the RRID and biotoolsID identifiers in the manuscript.

Close
