# Supplementary material for: Efficient DNA sequence compression with neural networks
Source: PubMed Central journal article supplement (PMC7657843; doi:10.1093/gigascience/giaa119), 2020-11-11
Supplement: giaa119_supplemental_file.pdf [file giaa119_supplemental_file.pdf]

# Supplementary Material of “Efficient DNA sequence compression with Neural Networks”

M. Silva, D. Pratas, A. J. Pinho

## Contents

|          |                                                     |           |
|----------|-----------------------------------------------------|-----------|
| <b>1</b> | <b>Stretching function plot</b>                     | <b>2</b>  |
| <b>2</b> | <b>Percentage of symbols guessed correctly</b>      | <b>2</b>  |
| <b>3</b> | <b>Results for general purpose compressors</b>      | <b>3</b>  |
| <b>4</b> | <b>Complete results for referential compression</b> | <b>4</b>  |
| <b>5</b> | <b>Referential complexity profiles</b>              | <b>8</b>  |
| <b>6</b> | <b>Referential hidden nodes effect</b>              | <b>9</b>  |
| <b>7</b> | <b>Referential histograms</b>                       | <b>10</b> |
| <b>8</b> | <b>Reproducibility</b>                              | <b>10</b> |
| 8.1      | Input data . . . . .                                | 10        |
| 8.1.1    | Downloading the genomes . . . . .                   | 11        |
| 8.1.2    | Genome identifiers . . . . .                        | 11        |
| 8.1.3    | Virome . . . . .                                    | 11        |
| 8.1.4    | Picea abies . . . . .                               | 11        |
| 8.1.5    | Homo sapiens . . . . .                              | 12        |
| 8.1.6    | Pan troglodytes . . . . .                           | 12        |
| 8.1.7    | Pongo abelii . . . . .                              | 12        |
| 8.1.8    | Gorilla gorilla . . . . .                           | 12        |
| 8.2      | Compressors . . . . .                               | 12        |
| 8.2.1    | Downloading the compressors . . . . .               | 12        |
| 8.2.2    | Running the compressors . . . . .                   | 13        |

## 1 Stretching function plot

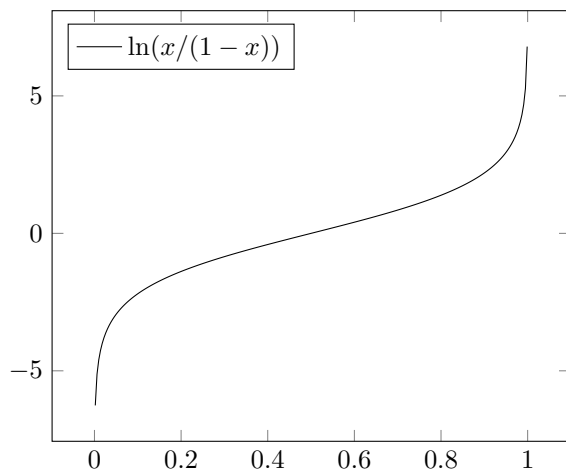

Figure S1: Stretching function applied to the models' probabilities.

## 2 Percentage of symbols guessed correctly

Table S1: Percentage of symbols guessed correctly by GeCo2 and GeCo3 for all sequences in dataset four (DS4). The improvement percentage of GeCo3 over GeCo2 is the diff.

| ID   | GeCo2 | GeCo3 | diff |
|------|-------|-------|------|
| HoSa | 47.1  | 48.5  | 2.9  |
| GaGa | 38.9  | 40.0  | 2.8  |
| DaRe | 54.9  | 55.9  | 1.8  |
| OrSa | 48.2  | 49.7  | 3.0  |
| DrMe | 38.5  | 39.7  | 3.0  |
| EnIn | 50.3  | 51.2  | 1.8  |
| ScPo | 35.8  | 36.2  | 1.1  |
| PlFa | 44.4  | 45.3  | 2.0  |
| EsCo | 35.9  | 36.5  | 1.6  |
| HaHi | 40.0  | 40.4  | 1.0  |
| AeCa | 36.7  | 37.3  | 1.6  |
| HePy | 42.2  | 42.7  | 1.2  |
| YeMi | 41.7  | 42.1  | 1.0  |
| AgPh | 35.1  | 35.2  | 0.3  |
| BuEb | 33.2  | 32.4  | -2.5 |

### 3 Results for general purpose compressors

Table S2: Number of bytes and time needed to represent a DNA sequence for CMIX, DeepZip and ZPAQ. CMIX and DeepZip were run with the default configuration and ZPAQ was run with level 5. Some tests were not run (NR) due to time constraints and DeepZip forced the computer to reboot (SF) with some sequences.

| DS | ID      | CMIX      |        | DeepZip   |        | ZPAQ      |        |
|----|---------|-----------|--------|-----------|--------|-----------|--------|
|    |         | size      | time   | size      | time   | size      | time   |
| 2  | PiAbC   | NR        | NR     | NR        | NR     | 2.75 GB   | 2h01m  |
|    | HoSaC   | NR        | NR     | NR        | NR     | 629.76 MB | 29m    |
|    | PaTrC   | NR        | NR     | NR        | NR     | 614.37 MB | 29m    |
|    | GoGoC   | NR        | NR     | NR        | NR     | 597.90 MB | 28m    |
|    | Total   | NR        | NR     | NR        | NR     | NR        | NR     |
|    | Archaea | NR        | NR     | NR        | NR     | 138.05 MB | 8m09s  |
| 3  | Virus   | NR        | NR     | NR        | NR     | 106.40 MB | 8m12s  |
|    | Total   | NR        | NR     | NR        | NR     | 244.45 MB | 16m21s |
| 4  | Mito    | NR        | NR     | NR        | NR     | 44.85 MB  | 2m59s  |
|    | HoSaY   | 4.80 MB   | 5h17m  | SF        | SF     | 5.28 MB   | 1m07s  |
|    | Total   | NR        | NR     | NR        | NR     | 50.13 MB  | 4m07s  |
| 5  | HoSa    | NR        | NR     | NR        | NR     | 41.49 MB  | 2m56s  |
|    | GaGa    | NR        | NR     | NR        | NR     | 34.69 MB  | 2m54s  |
|    | DaRe    | 12.19 MB  | 12h20m | NR        | NR     | 13.18 MB  | 2m34s  |
|    | OrSa    | 9.04 MB   | 8h55m  | SF        | SF     | 9.64 MB   | 1m48s  |
|    | DrMe    | 7.46 MB   | 6h41m  | SF        | SF     | 7.61 MB   | 1m20s  |
|    | EnIn    | 5.58 MB   | 5h21m  | SF        | SF     | 6.13 MB   | 1m05s  |
|    | ScPo    | 2.54 MB   | 2h08m  | SF        | SF     | 2.58 MB   | 25s    |
|    | PlFa    | 1.93 MB   | 1h48m  | SF        | SF     | 1.99 MB   | 21s    |
|    | EsCo    | 1.09 MB   | 56m37s | SF        | SF     | 1.11 MB   | 11s    |
|    | HaHi    | 882.71 KB | 46m57s | 883.07 KB | 1h19m  | 902.85 KB | 9s     |
|    | AeCa    | 370.61 KB | 19m01s | 371.88 KB | 32m41s | 380.13 KB | 3s     |
|    | HePy    | 376.61 KB | 20m03s | 377.53 KB | 34m49s | 384.42 KB | 3s     |
|    | YeMi    | 16.68 KB  | 58s    | 19.53 KB  | 1m33s  | 17.83 KB  | 0s     |
|    | AgPh    | 10.70 KB  | 36s    | 12.24 KB  | 59s    | 11.77 KB  | 0s     |
|    | BuEb    | 4.68 KB   | 17s    | 6.23 KB   | 31s    | 5.77 KB   | 0s     |
|    | Total   | NR        | NR     | NR        | NR     | 120.13 MB | 13m53s |

## 4 Complete results for referential compression

Table S3: Pairwise referential compression ratio and speed in kB/s for PT sequence using HS as reference. GeCo3 uses 64 hidden nodes and has 0.03 learning rate. The configuration for GeCo2-r and GeCo3-r is ”-rm 20:500:1:35:0.95/3:100:0.95 -rm 13:200:1:1:0.95/0:0:0 -rm 10:10:0:0:0.95/0:0:0”. For GeCo2-h and GeCo3-h the following models were added ”-tm 4:1:0:1:0.9/0:0:0 -tm 17:100:1:10:0.95/2:20:0.95”. iDoComp, GDC2 and HRCM use the default configuration.

| ID    | HRCM  |       | GDC2  |       | iDoComp     |       | GeCo2-r |       | GeCo3-r |       | GeCo2-h |       | GeCo3-h     |       |
|-------|-------|-------|-------|-------|-------------|-------|---------|-------|---------|-------|---------|-------|-------------|-------|
|       | ratio | speed | ratio | speed | ratio       | speed | ratio   | speed | ratio   | speed | ratio   | speed | ratio       | speed |
| PT_1  | 4.33  | 1,260 | 3.16  | 889   | <b>2.89</b> | 2,531 | 4.12    | 525   | 3.60    | 297   | 4.03    | 378   | 3.51        | 223   |
| PT_2  | 4.95  | 1,602 | 3.68  | 1,010 | <b>3.36</b> | 2,473 | 4.09    | 523   | 3.57    | 298   | 4.01    | 377   | 3.49        | 223   |
| PT_3  | 4.22  | 2,067 | 3.02  | 1,425 | <b>2.72</b> | 2,630 | 4.08    | 528   | 3.54    | 301   | 3.98    | 381   | 3.46        | 225   |
| PT_4  | 9.47  | 2,027 | 7.93  | 777   | 7.58        | 2,154 | 4.31    | 539   | 3.75    | 297   | 4.16    | 376   | <b>3.62</b> | 223   |
| PT_5  | 11.84 | 1,745 | 10.17 | 523   | 9.82        | 1,853 | 4.03    | 494   | 3.54    | 288   | 3.95    | 355   | <b>3.47</b> | 218   |
| PT_6  | 4.61  | 2,245 | 3.40  | 1,482 | <b>3.13</b> | 2,574 | 4.04    | 539   | 3.51    | 292   | 3.95    | 379   | 3.45        | 224   |
| PT_7  | 5.40  | 1,743 | 4.13  | 887   | 3.87        | 2,519 | 4.27    | 531   | 3.75    | 298   | 4.11    | 376   | <b>3.61</b> | 227   |
| PT_8  | 4.58  | 2,693 | 3.27  | 1,756 | <b>2.96</b> | 2,634 | 4.19    | 534   | 3.67    | 298   | 4.07    | 378   | 3.56        | 229   |
| PT_9  | 7.93  | 2,121 | 6.51  | 702   | 6.28        | 2,219 | 3.97    | 515   | 3.50    | 293   | 3.90    | 365   | <b>3.42</b> | 222   |
| PT_10 | 4.36  | 2,310 | 3.16  | 1,493 | <b>2.92</b> | 2,639 | 4.00    | 531   | 3.52    | 290   | 3.91    | 374   | 3.43        | 226   |
| PT_11 | 4.21  | 2,735 | 3.04  | 1,465 | <b>2.80</b> | 2,648 | 4.01    | 534   | 3.52    | 300   | 3.91    | 375   | 3.44        | 226   |
| PT_12 | 11.70 | 1,540 | 10.14 | 391   | 9.94        | 2,044 | 4.07    | 536   | 3.57    | 299   | 3.97    | 379   | <b>3.48</b> | 225   |
| PT_13 | 4.97  | 4,093 | 3.75  | 2,149 | 3.54        | 2,645 | 3.89    | 522   | 3.45    | 298   | 3.81    | 371   | <b>3.35</b> | 227   |
| PT_14 | 3.97  | 3,348 | 2.88  | 2,069 | <b>2.71</b> | 2,776 | 3.92    | 524   | 3.45    | 296   | 3.84    | 378   | 3.36        | 224   |
| PT_15 | 5.99  | 2,679 | 4.75  | 1,056 | 4.60        | 2,515 | 3.97    | 530   | 3.53    | 292   | 3.88    | 373   | <b>3.43</b> | 224   |
| PT_16 | 6.57  | 1,904 | 5.17  | 680   | 5.01        | 2,459 | 4.48    | 525   | 3.98    | 293   | 4.34    | 366   | <b>3.84</b> | 224   |
| PT_17 | 12.70 | 1,096 | 11.27 | 193   | 11.29       | 2,000 | 4.16    | 525   | 3.72    | 295   | 4.02    | 378   | <b>3.56</b> | 223   |
| PT_18 | 8.41  | 3,805 | 7.13  | 417   | 6.98        | 2,306 | 3.78    | 520   | 3.35    | 297   | 3.70    | 374   | <b>3.27</b> | 228   |
| PT_19 | 5.38  | 1,258 | 4.14  | 630   | <b>4.10</b> | 2,874 | 5.20    | 554   | 4.61    | 302   | 4.98    | 388   | 4.38        | 227   |
| PT_20 | 4.88  | 3,791 | 3.76  | 1,456 | <b>3.65</b> | 2,833 | 4.53    | 537   | 4.08    | 302   | 4.32    | 378   | 3.84        | 227   |
| PT_21 | 4.12  | 6,096 | 3.05  | 2,799 | <b>3.00</b> | 2,704 | 3.97    | 490   | 3.53    | 281   | 3.87    | 350   | 3.43        | 213   |
| PT_22 | 6.51  | 3,002 | 5.37  | 929   | 5.40        | 2,583 | 4.16    | 497   | 3.75    | 286   | 4.04    | 358   | <b>3.63</b> | 218   |
| PT_X  | 3.65  | 2,833 | 2.78  | 1,512 | <b>2.63</b> | 2,670 | 3.95    | 540   | 3.41    | 297   | 3.84    | 373   | 3.30        | 224   |
| PT_Y  | 15.99 | 4,340 | 14.92 | 1,128 | 15.35       | 2,082 | 9.71    | 534   | 8.37    | 296   | 5.23    | 368   | <b>4.58</b> | 218   |
| Total | 6.29  | 2,006 | 5.01  | 841   | 4.78        | 2,430 | 4.16    | 527   | 3.65    | 296   | 4.02    | 374   | <b>3.52</b> | 224   |

Table S4: Pairwise referential compression ratio and speed in kB/s for PA sequence using HS as reference. Same configurations as in Table 3.

| ID    | HRCM  |       | GDC2  |       | iDoComp     |       | GeCo2-r |       | GeCo3-r |       | GeCo2-h |       | GeCo3-h     |       |
|-------|-------|-------|-------|-------|-------------|-------|---------|-------|---------|-------|---------|-------|-------------|-------|
|       | ratio | speed | ratio | speed | ratio       | speed | ratio   | speed | ratio   | speed | ratio   | speed | ratio       | speed |
| PA_1  | 26.84 | 624   | 24.26 | 131   | 23.88       | 1,340 | 7.49    | 528   | 6.54    | 297   | 7.22    | 370   | <b>6.37</b> | 225   |
| PA_2  | 18.54 | 936   | 15.54 | 295   | 14.54       | 1,670 | 7.53    | 511   | 6.59    | 296   | 7.31    | 370   | <b>6.45</b> | 224   |
| PA_3  | 20.34 | 1,116 | 17.42 | 299   | 16.57       | 1,580 | 7.34    | 518   | 6.40    | 294   | 7.13    | 367   | <b>6.30</b> | 223   |
| PA_4  | 13.25 | 1,565 | 9.94  | 743   | 8.59        | 2,025 | 7.66    | 518   | 6.67    | 297   | 7.42    | 371   | <b>6.53</b> | 225   |
| PA_5  | 11.47 | 1,510 | 8.13  | 813   | 6.77        | 2,178 | 7.47    | 516   | 6.51    | 297   | 7.22    | 369   | <b>6.37</b> | 222   |
| PA_6  | 10.99 | 1,465 | 7.68  | 906   | 6.39        | 2,209 | 7.36    | 517   | 6.42    | 296   | 7.13    | 367   | <b>6.30</b> | 223   |
| PA_7  | 19.33 | 1,054 | 16.42 | 241   | 15.59       | 1,604 | 7.51    | 492   | 6.57    | 289   | 7.27    | 357   | <b>6.41</b> | 217   |
| PA_8  | 11.98 | 1,749 | 8.58  | 898   | 7.24        | 2,170 | 7.62    | 514   | 6.66    | 295   | 7.37    | 367   | <b>6.52</b> | 221   |
| PA_9  | 17.00 | 1,423 | 14.18 | 352   | 13.42       | 1,760 | 7.19    | 501   | 6.31    | 291   | 6.97    | 360   | <b>6.16</b> | 223   |
| PA_10 | 16.10 | 1,334 | 12.99 | 423   | 12.02       | 1,874 | 7.66    | 523   | 6.72    | 294   | 7.37    | 369   | <b>6.54</b> | 223   |
| PA_11 | 18.51 | 1,468 | 15.65 | 300   | 14.87       | 1,697 | 7.37    | 506   | 6.46    | 293   | 7.15    | 366   | <b>6.32</b> | 222   |
| PA_12 | 10.95 | 1,299 | 7.74  | 685   | 6.64        | 2,265 | 7.46    | 519   | 6.53    | 295   | 7.24    | 375   | <b>6.39</b> | 224   |
| PA_13 | 11.06 | 2,755 | 7.82  | 1,463 | 6.71        | 2,286 | 7.45    | 524   | 6.54    | 296   | 7.20    | 373   | <b>6.38</b> | 222   |
| PA_14 | 10.59 | 2,073 | 7.47  | 1,108 | 6.52        | 2,326 | 7.34    | 512   | 6.41    | 295   | 7.09    | 373   | <b>6.26</b> | 221   |
| PA_15 | 12.45 | 1,764 | 9.48  | 643   | 8.71        | 2,142 | 7.47    | 512   | 6.56    | 294   | 7.19    | 373   | <b>6.37</b> | 222   |
| PA_16 | 13.06 | 1,276 | 9.88  | 411   | 9.03        | 1,965 | 8.00    | 471   | 7.04    | 280   | 7.68    | 343   | <b>6.82</b> | 214   |
| PA_17 | 14.34 | 899   | 11.49 | 228   | 10.96       | 1,973 | 7.53    | 502   | 6.65    | 291   | 7.30    | 361   | <b>6.48</b> | 219   |
| PA_18 | 13.43 | 2,914 | 10.44 | 344   | 9.59        | 2,067 | 7.33    | 506   | 6.43    | 292   | 7.10    | 366   | <b>6.31</b> | 221   |
| PA_19 | 11.96 | 778   | 9.11  | 332   | 8.77        | 2,381 | 8.74    | 542   | 7.66    | 298   | 8.37    | 383   | <b>7.39</b> | 223   |
| PA_20 | 12.00 | 2,312 | 9.07  | 675   | 8.39        | 2,215 | 7.38    | 506   | 6.49    | 290   | 7.09    | 367   | <b>6.29</b> | 219   |
| PA_21 | 11.00 | 4,233 | 8.08  | 1,400 | 7.52        | 2,299 | 8.02    | 488   | 7.05    | 273   | 7.70    | 350   | <b>6.85</b> | 212   |
| PA_22 | 12.91 | 2,115 | 10.29 | 570   | 10.00       | 2,232 | 8.35    | 506   | 7.41    | 288   | 7.90    | 359   | <b>7.06</b> | 218   |
| PA_X  | 9.77  | 1,734 | 6.93  | 914   | <b>6.00</b> | 2,279 | 7.25    | 531   | 6.21    | 295   | 6.96    | 368   | 6.04        | 219   |
| Total | 6.29  | 2,006 | 5.01  | 841   | 4.78        | 2,430 | 4.16    | 527   | 3.65    | 296   | 4.02    | 374   | <b>3.52</b> | 224   |

Table S5: Pairwise referential compression ratio and speed in kB/s for GG sequence using HS as reference. Same configurations as in Table 3.

| ID    | HRCM  |       | GDC2  |       | iDoComp     |       | GeCo2-r |       | GeCo3-r |       | GeCo2-h |       | GeCo3-h      |       |
|-------|-------|-------|-------|-------|-------------|-------|---------|-------|---------|-------|---------|-------|--------------|-------|
|       | ratio | speed | ratio | speed | ratio       | speed | ratio   | speed | ratio   | speed | ratio   | speed | ratio        | speed |
| GG_1  | 6.27  | 1,064 | 4.58  | 687   | 4.15        | 2,326 | 4.78    | 517   | 4.17    | 294   | 4.68    | 371   | <b>4.08</b>  | 223   |
| GG_2  | 7.12  | 1,345 | 5.35  | 781   | 4.85        | 2,312 | 4.82    | 526   | 4.21    | 296   | 4.73    | 374   | <b>4.14</b>  | 226   |
| GG_3  | 5.54  | 1,766 | 3.88  | 1,241 | <b>3.43</b> | 2,489 | 4.65    | 530   | 4.05    | 297   | 4.57    | 375   | 4.00         | 220   |
| GG_4  | 7.66  | 2,080 | 5.87  | 1,096 | 5.38        | 2,308 | 4.86    | 526   | 4.25    | 298   | 4.75    | 375   | <b>4.13</b>  | 225   |
| GG_5  | 13.35 | 1,180 | 11.48 | 411   | 11.17       | 1,781 | 10.63   | 502   | 9.89    | 285   | 10.26   | 361   | <b>9.59</b>  | 220   |
| GG_6  | 5.50  | 1,995 | 3.88  | 1,460 | <b>3.46</b> | 2,525 | 4.71    | 528   | 4.09    | 298   | 4.59    | 375   | 4.02         | 224   |
| GG_7  | 9.54  | 1,429 | 7.71  | 499   | 7.31        | 2,107 | 4.87    | 510   | 4.26    | 286   | 4.75    | 369   | <b>4.16</b>  | 220   |
| GG_8  | 13.67 | 1,835 | 11.58 | 555   | 11.15       | 1,905 | 4.79    | 526   | 4.22    | 295   | 4.69    | 371   | <b>4.12</b>  | 227   |
| GG_9  | 12.86 | 1,761 | 11.01 | 426   | 10.69       | 1,864 | 4.62    | 496   | 4.05    | 288   | 4.52    | 358   | <b>3.97</b>  | 220   |
| GG_10 | 13.23 | 1,551 | 11.26 | 440   | 10.91       | 1,920 | 4.64    | 520   | 4.10    | 295   | 4.54    | 369   | <b>4.00</b>  | 221   |
| GG_11 | 5.95  | 2,273 | 4.29  | 1,111 | <b>3.89</b> | 2,331 | 4.74    | 495   | 4.14    | 287   | 4.61    | 358   | 4.04         | 220   |
| GG_12 | 12.12 | 1,457 | 10.26 | 389   | 9.97        | 2,001 | 4.69    | 526   | 4.11    | 295   | 4.60    | 371   | <b>4.02</b>  | 224   |
| GG_13 | 5.24  | 3,792 | 3.68  | 2,403 | <b>3.34</b> | 2,575 | 4.53    | 513   | 4.01    | 295   | 4.44    | 368   | 3.90         | 223   |
| GG_14 | 11.38 | 2,348 | 9.66  | 644   | 9.42        | 2,095 | 4.65    | 527   | 4.11    | 294   | 4.52    | 373   | <b>3.99</b>  | 221   |
| GG_15 | 5.24  | 2,539 | 3.70  | 1,537 | <b>3.44</b> | 2,539 | 4.56    | 504   | 4.05    | 283   | 4.47    | 365   | 3.95         | 220   |
| GG_16 | 6.72  | 1,726 | 4.94  | 788   | 4.65        | 2,380 | 5.16    | 496   | 4.59    | 279   | 5.03    | 359   | <b>4.45</b>  | 219   |
| GG_17 | 23.13 | 1,352 | 21.15 | 100   | 20.98       | 1,618 | 19.00   | 588   | 17.97   | 314   | 18.16   | 404   | <b>17.43</b> | 235   |
| GG_18 | 9.24  | 3,549 | 7.62  | 399   | 7.39        | 2,220 | 4.50    | 514   | 3.99    | 293   | 4.39    | 368   | <b>3.88</b>  | 222   |
| GG_19 | 6.69  | 1,100 | 5.08  | 485   | 4.98        | 2,275 | 5.75    | 461   | 5.06    | 268   | 5.53    | 338   | <b>4.86</b>  | 209   |
| GG_20 | 5.66  | 3,307 | 4.14  | 1,425 | <b>3.92</b> | 2,633 | 4.91    | 509   | 4.39    | 292   | 4.77    | 367   | 4.24         | 221   |
| GG_21 | 5.24  | 5,531 | 3.77  | 2,500 | <b>3.62</b> | 2,572 | 4.66    | 469   | 4.15    | 277   | 4.56    | 338   | 4.04         | 213   |
| GG_22 | 5.50  | 2,922 | 4.06  | 1,510 | <b>3.98</b> | 2,576 | 4.86    | 468   | 4.33    | 278   | 4.66    | 343   | 4.17         | 211   |
| GG_X  | 4.89  | 2,395 | 3.50  | 1,427 | <b>3.20</b> | 2,569 | 4.79    | 517   | 4.12    | 296   | 4.67    | 370   | 4.02         | 222   |
| Total | 8.80  | 1,691 | 7.06  | 588   | 6.70        | 2,201 | 5.58    | 516   | 4.96    | 293   | 5.43    | 369   | <b>4.84</b>  | 222   |

Table S6: Pairwise referential compression ratio and speed in kB/s for HS sequence using GG as reference. Same configurations as in Table 3.

| ID    | HRCM  |       | GDC2  |       | iDoComp     |       | GeCo2-r |       | GeCo3-r |       | GeCo2-h |       | GeCo3-h      |       |
|-------|-------|-------|-------|-------|-------------|-------|---------|-------|---------|-------|---------|-------|--------------|-------|
|       | ratio | speed | ratio | speed | ratio       | speed | ratio   | speed | ratio   | speed | ratio   | speed | ratio        | speed |
| HS_1  | 7.13  | 1,081 | 5.69  | 621   | 5.27        | 2,482 | 5.53    | 559   | 4.84    | 305   | 5.03    | 390   | <b>4.44</b>  | 230   |
| HS_2  | 7.48  | 1,373 | 5.86  | 827   | 5.39        | 2,362 | 5.06    | 543   | 4.42    | 301   | 4.78    | 376   | <b>4.19</b>  | 229   |
| HS_3  | 5.83  | 1,801 | 4.43  | 1,251 | <b>4.00</b> | 2,534 | 4.97    | 544   | 4.35    | 301   | 4.69    | 380   | 4.13         | 227   |
| HS_4  | 7.82  | 2,090 | 6.25  | 1,159 | 5.78        | 2,341 | 5.19    | 534   | 4.68    | 299   | 4.81    | 376   | <b>4.21</b>  | 227   |
| HS_5  | 14.85 | 1,387 | 13.20 | 299   | 12.83       | 1,988 | 12.00   | 587   | 11.15   | 312   | 11.23   | 405   | <b>10.59</b> | 236   |
| HS_6  | 5.70  | 2,002 | 4.18  | 1,438 | <b>3.78</b> | 2,559 | 4.90    | 537   | 4.28    | 298   | 4.70    | 377   | 4.13         | 226   |
| HS_7  | 10.28 | 1,508 | 8.71  | 635   | 8.39        | 2,283 | 5.70    | 568   | 5.02    | 308   | 5.21    | 394   | <b>4.63</b>  | 233   |
| HS_8  | 13.79 | 1,897 | 12.00 | 627   | 11.59       | 1,974 | 5.28    | 539   | 4.65    | 299   | 4.83    | 382   | <b>4.26</b>  | 228   |
| HS_9  | 14.13 | 1,900 | 12.70 | 541   | 12.44       | 2,061 | 6.68    | 579   | 6.12    | 311   | 5.08    | 403   | <b>4.54</b>  | 235   |
| HS_10 | 13.52 | 1,630 | 11.77 | 490   | 11.40       | 2,009 | 5.21    | 549   | 4.60    | 305   | 4.86    | 385   | <b>4.31</b>  | 228   |
| HS_11 | 8.08  | 2,442 | 6.70  | 1,184 | 6.31        | 2,614 | 6.66    | 584   | 5.88    | 311   | 6.11    | 399   | <b>5.52</b>  | 232   |
| HS_12 | 12.35 | 1,512 | 10.82 | 455   | 10.61       | 2,081 | 5.32    | 557   | 4.70    | 305   | 4.89    | 386   | <b>4.32</b>  | 228   |
| HS_13 | 6.16  | 3,921 | 4.91  | 2,248 | 4.59        | 2,689 | 5.53    | 548   | 4.97    | 303   | 4.96    | 388   | <b>4.44</b>  | 227   |
| HS_14 | 11.73 | 2,412 | 10.33 | 726   | 10.14       | 2,182 | 5.31    | 546   | 4.71    | 295   | 4.80    | 384   | <b>4.24</b>  | 229   |
| HS_15 | 6.56  | 2,694 | 5.71  | 1,304 | 5.52        | 2,785 | 6.06    | 584   | 5.79    | 309   | 4.88    | 402   | <b>4.37</b>  | 235   |
| HS_16 | 8.56  | 1,920 | 7.22  | 805   | 7.01        | 2,723 | 6.78    | 599   | 6.03    | 313   | 5.92    | 411   | <b>5.35</b>  | 235   |
| HS_17 | 21.51 | 1,294 | 20.50 | 347   | 20.74       | 1,512 | 18.02   | 514   | 16.92   | 295   | 16.15   | 373   | <b>15.43</b> | 221   |
| HS_18 | 9.25  | 3,850 | 8.98  | 1,166 | 8.89        | 2,390 | 6.09    | 564   | 7.08    | 209   | 4.44    | 400   | <b>3.96</b>  | 233   |
| HS_19 | 10.50 | 1,331 | 9.41  | 401   | 9.59        | 2,924 | 9.09    | 668   | 8.13    | 329   | 8.20    | 446   | <b>7.51</b>  | 242   |
| HS_20 | 6.50  | 3,494 | 5.65  | 1,583 | 5.53        | 2,827 | 5.98    | 573   | 5.37    | 307   | 5.17    | 399   | <b>4.64</b>  | 230   |
| HS_21 | 8.20  | 5,874 | 7.75  | 2,022 | 7.71        | 2,996 | 7.96    | 597   | 7.28    | 318   | 5.72    | 415   | <b>5.17</b>  | 236   |
| HS_22 | 8.80  | 3,280 | 8.06  | 899   | 8.21        | 3,056 | 7.99    | 616   | 7.10    | 320   | 6.40    | 424   | <b>5.82</b>  | 239   |
| HS_X  | 5.33  | 2,443 | 4.46  | 1,503 | 4.23        | 2,687 | 5.43    | 548   | 4.83    | 305   | 4.79    | 383   | <b>4.14</b>  | 230   |
| Total | 9.48  | 1,773 | 8.11  | 712   | 7.80        | 2,332 | 6.43    | 558   | 5.81    | 301   | 5.77    | 389   | <b>5.19</b>  | 230   |

Table S7: Total referential compression ratio and speed in kB/s for a re-sequenced Korean human genome. GeCo3 uses 64 hidden nodes and has 0.03 learning rate. The configuration for GeCo2-r and GeCo3-r (relative approach) is "-rm 20:500:1:35:0.95/3:100:0.95 -rm 13:200:1:1:0.95/0:0:0 -rm 10:10:0:0:0.95/0:0:0". For GeCo2-h and GeCo3-h (conditional approach) the following models were added "-tm 4:1:0:1:0.9/0:0:0 -tm 17:100:1:10:0.95/2:20:0.95". iDoComp, GDC2 and HRCM use the default configuration.

| HRCM        | GDC2         | iDoComp     | GeCo2-r     | GeCo3-r     | GeCo2-h     | GeCo3-h     |     |      |     |      |     |      |     |
|-------------|--------------|-------------|-------------|-------------|-------------|-------------|-----|------|-----|------|-----|------|-----|
| ratio speed | ratio speed  | ratio speed | ratio speed | ratio speed | ratio speed | ratio speed |     |      |     |      |     |      |     |
| <b>0.27</b> | <u>9,552</u> | 0.29        | 2,620       | 0.27        | 3,228       | 1.55        | 547 | 1.30 | 306 | 1.55 | 384 | 1.24 | 229 |

## 5 Referential complexity profiles

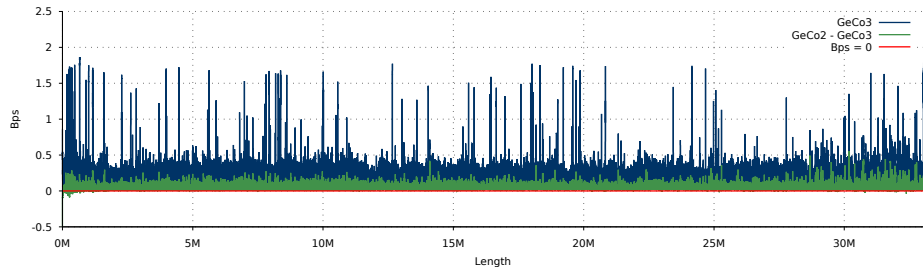

(a) PT\_21 - Chromosome 21 from *Pan troglodytes* compressed with the corresponding *Homo sapiens* chromosome.

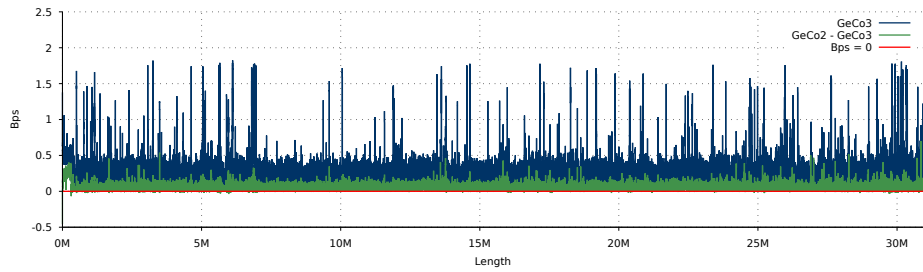

(b) GG\_22 - Chromosome 22 from *Gorilla gorilla* compressed with the corresponding *Homo sapiens* chromosome.

Figure S2: Smoothed number of bits per symbol (Bps) of GeCo2 subtracted by GeCo3 Bps. The Bps were obtained by referential compression of PT\_21 and GG\_22, with the same parameters as in Table 3. Places where the line rises above zero indicate that GeCo3 has better compression than GeCo2.



## 6 Referential hidden nodes effect

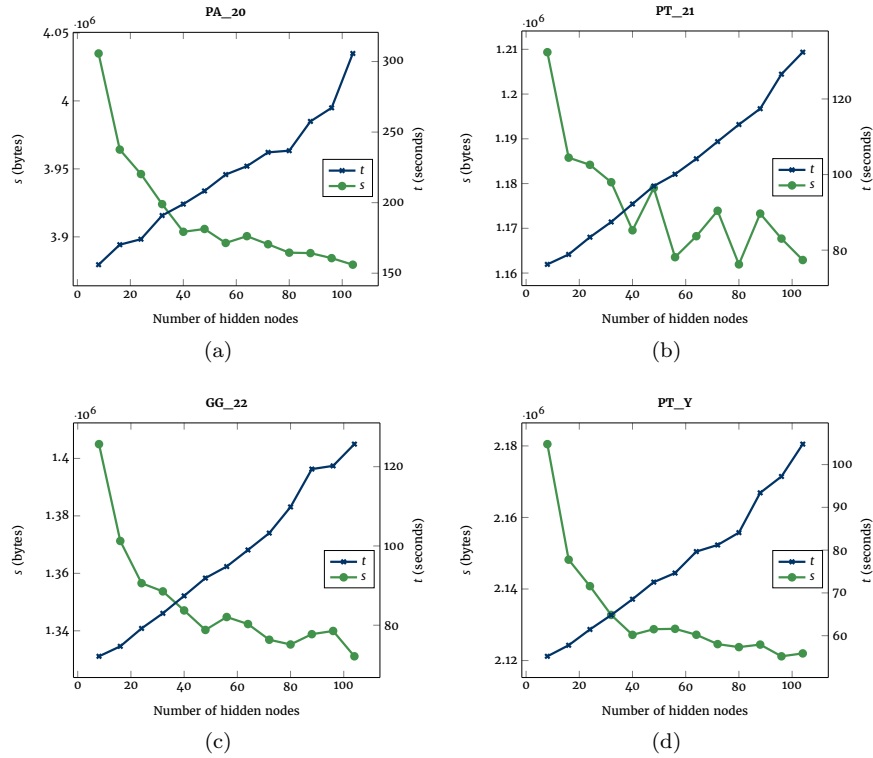

Figure S3: Effect of the number of hidden nodes in reference compressed sequence size and time.

## 7 Referential histograms

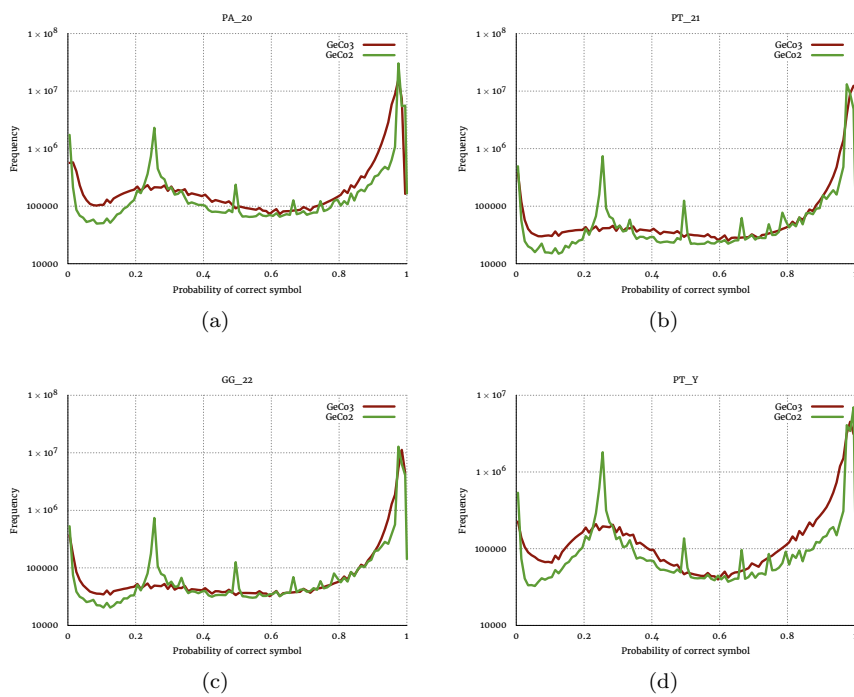

Figure S4: Histograms for GeCo2 and GeCo3 with the vertical axis in a log 10 scale.

## 8 Reproducibility

### 8.1 Input data

The input data is constituted by FASTA or FASTQ pre-processed with the following commands:

---

```
# Convert FASTQ to sequence.
# gto tools can be installed with bioconda
gto_fastq_to_fasta < $name.fastq | gto_fasta_to_seq > $name.seq

# Convert FASTA to sequence.
# Remove all characters that are not ACGT
grep -v ">" < $FASTAFILE | tr "acgt" "ACGT" | tr -d -c "ACGT" > $SEQ

# In the case that the compressor needs the file to be FASTA then the
following was run:
echo ">" > $SEQF && cat $SEQ >> $SEQF

# For HRCM the sequence could not be all in the same line so the
following was run:
```

```
fold -w80 $SEQF > $SEQF
```

---

### 8.1.1 Downloading the genomes

The genomes were obtained from:

- Denisova: [http://cdna.eva.mpg.de/denisova/raw\\_reads/SL3004\\_SR.txt.gz](http://cdna.eva.mpg.de/denisova/raw_reads/SL3004_SR.txt.gz) and [http://cdna.eva.mpg.de/denisova/raw\\_reads/B1130\\_SR.txt.gz](http://cdna.eva.mpg.de/denisova/raw_reads/B1130_SR.txt.gz)
- Virome: using fastq-dump <https://ncbi.github.io/sra-tools/fastq-dump.html>
- PiAbC: [ftp://ftp.ncbi.nlm.nih.gov/genomes/all/GCA/900/067/695/GCA\\_900067695.1\\_Pabies01/GCA\\_900067695.1\\_Pabies01\\_genomic.fna.gz](ftp://ftp.ncbi.nlm.nih.gov/genomes/all/GCA/900/067/695/GCA_900067695.1_Pabies01/GCA_900067695.1_Pabies01_genomic.fna.gz)
- HoSaC and HoSaY: <https://www.ncbi.nlm.nih.gov/genome/?term=homo+sapiens>
- PaTrC: <https://www.ncbi.nlm.nih.gov/genome/?term=pan-troglodytes>
- GoGoC: [https://www.ncbi.nlm.nih.gov/genome/?term=gorilla+gorilla\[orgn\]](https://www.ncbi.nlm.nih.gov/genome/?term=gorilla+gorilla[orgn])
- Archaea and Virus: using the script from: [https://github.com/cobilab/gto/blob/master/scripts/gto\\_build\\_dbs.sh](https://github.com/cobilab/gto/blob/master/scripts/gto_build_dbs.sh). The date of sequence download: 24-04-2020. Alternatively from [Silva et al.(2020)Silva, Pratas, and Pinho].
- Mito: <ftp://ftp.ncbi.nlm.nih.gov/refseq/release/mitochondrion/mitochondrion.1.1.genomic.fna.gz> and <ftp://ftp.ncbi.nlm.nih.gov/refseq/release/mitochondrion/mitochondrion.2.1.genomic.fna.gz>
- All files in dataset 4 available from the supporting data [Silva et al.(2020)Silva, Pratas, and Pinho].

For reference compression:

- HS: <https://www.ncbi.nlm.nih.gov/genome/?term=homo+sapiens>
- PT: <https://www.ncbi.nlm.nih.gov/genome/?term=pan-troglodytes>
- GG: [https://www.ncbi.nlm.nih.gov/genome/?term=gorilla+gorilla\[orgn\]](https://www.ncbi.nlm.nih.gov/genome/?term=gorilla+gorilla[orgn])
- PA: <https://www.ncbi.nlm.nih.gov/genome/?term=Pongo+abelii+genome>

### 8.1.2 Genome identifiers

#### 8.1.3 Virome

---

SRR12175231, SRR12175232, SRR12175233, SRR12175234, SRR12175235,  
SRR12175236, SRR12175237, SRR12175238, SRR12175239, SRR12175240

---

#### 8.1.4 *Picea abies*

---

GCA\_900067695.1

---

### 8.1.5 Homo sapiens

---

NC\_000001.11, NC\_000002.12, NC\_000003.12, NC\_000004.12, NC\_000005.10,  
NC\_000006.12, NC\_000007.14, NC\_000008.11, NC\_000009.12, NC\_000010.11  
NC\_000011.10, NC\_000012.12, NC\_000013.11, NC\_000014.9, NC\_000015.10,  
NC\_000016.10, NC\_000017.11, NC\_000018.10, NC\_000019.10, NC\_000020.11,  
NC\_000021.9, NC\_000022.11, NC\_000023.11, NC\_000024.10, NC\_012920.1

---

### 8.1.6 Pan troglodytes

---

NC\_001643.1, NC\_006492.4, NC\_036879.1, NC\_036880.1, NC\_036881.1,  
NC\_036882.1, NC\_036883.1, NC\_036884.1, NC\_036885.1, NC\_036886.1,  
NC\_036887.1, NC\_036888.1, NC\_036889.1, NC\_036890.1, NC\_036891.1,  
NC\_036892.1, NC\_036893.1, NC\_036894.1, NC\_036895.1, NC\_036896.1,  
NC\_036897.1, NC\_036898.1, NC\_036899.1, NC\_036900.1, NC\_036901.1,  
NC\_036902.1

---

### 8.1.7 Pongo abelii

---

NC\_002083.1, NC\_036903.1, NC\_036904.1, NC\_036905.1, NC\_036906.1,  
NC\_036907.1, NC\_036908.1, NC\_036909.1, NC\_036910.1, NC\_036911.1,  
NC\_036912.1, NC\_036913.1, NC\_036914.1, NC\_036915.1, NC\_036916.1,  
NC\_036917.1, NC\_036918.1, NC\_036919.1, NC\_036920.1, NC\_036921.1,  
NC\_036922.1, NC\_036923.1, NC\_036924.1, NC\_036925.1, NC\_036926.1

---

### 8.1.8 Gorilla gorilla

---

NC\_011120.1, NC\_044602.1, NC\_044603.1, NC\_044604.1, NC\_044605.1,  
NC\_044606.1, NC\_044607.1, NC\_044608.1, NC\_044609.1, NC\_044610.1,  
NC\_044611.1, NC\_044612.1, NC\_044613.1, NC\_044614.1, NC\_044615.1,  
NC\_044616.1, NC\_044617.1, NC\_044618.1, NC\_044619.1, NC\_044620.1,  
NC\_044621.1, NC\_044622.1, NC\_044623.1, NC\_044624.1, NC\_044625.1

---

## 8.2 Compressors

### 8.2.1 Downloading the compressors

The compressors were obtained from:

- GeCo2: <https://github.com/cobilab/geco2>
- Jarvis: <https://github.com/cobilab/jarvis>
- XM: <https://github.com/mdcao/japsa/>
- NAF: <https://github.com/KirillKryukov/naf>
- iDoComp: <https://github.com/mikelhernaiz/iDoComp>
- GDC2: <https://github.com/refresh-bio/GDC2>

- HRCM: <https://github.com/haicy/HRCM>

## 8.2.2 Running the compressors

To run GeCo3:

---

```
./GeCo3 $OPTIONS $SEQ

# Example of reference free compression, using level 1, BuEb sequence,
# learning rate of 0.06 and 8 hidden nodes.
./GeCo3 -l 1 -lr 0.06 -hs 8 DNACorpus/BuEb

# Example of referential compression, using human chromosome 4 as
# reference and the corresponding gorilla chromosome as target. The
# learning rate is 0.03 and 64 hidden nodes
./GeCo3 -rm 20:500:1:35:0.95/3:100:0.95 -rm 13:200:1:1:0.95/0:0:0 -rm
10:10:0:0:0.95/0:0:0 -lr 0.03 -hs 64 -r PT_C4 GG_C4
```

---

To run GeCo2:

---

```
./GeCo2 $OPTIONS $SEQ

# Example of reference free compression, using level 1 and BuEb sequence
./GeCo2 -l 1 BuEb

# Example of referential compression, using human chromosome 4 as
# reference and the corresponding gorilla chromosome as target
./GeCo2 -rm 20:500:1:35:0.95/3:100:0.95 -rm 13:200:1:1:0.95/0:0:0 -rm
10:10:0:0:0.95/0:0:0 -r PT_C4 GG_C4
```

---

To run Jarvis:

---

```
time ./JARVIS $OPTIONS $SEQ

# Example of reference free compression, using level 1 and BuEb sequence
time ./JARVIS -l 1 BuEb
```

---

To run XM:

---

```
jsa.xm.compress $OPTIONS $SEQF

# Example of reference free compression, using BuEb sequence
jsa.xm.compress --real=BuEb.xm BuEb.fasta
```

---

To run NAF:

---

```
time ./ennaf $OPTIONS $SEQF

# Example of reference free compression, using BuEb sequence
time ./ennaf --temp-dir /tmp -22 BuEb.fasta
```

---

To run iDoComp:

```
# Example of referential compression, using human chromosome 4 as
  reference and the corresponding gorilla chromosome as target
REFSEQ=HS_C4
SEQ=GG_C4

cd idocomp
cd sais-lite-2.4.1/
mkdir sa ref tar;
cp $REFSEQ ref/$REFSEQ.fa
./generateSA.sh ref sa
cp $SEQ tar/$SEQ.fa
echo "ref/$REFSEQ.fa tar/$SEQ.fa sa/$REFSEQ.sa" > f.txt;
cp ../simulations/iDoComp.run .
./iDoComp.run c f.txt OUT
```

---

To run GDC2:

---

```
time ./GDC2 c xxx $REFSEQ $SEQ
```

```
# Example of referential compression, using human chromosome 4 as
  reference and the corresponding gorilla chromosome as target
```

```
time ./GDC2 c xxx HS_C4 GG_C4
```

---

To run HRCM:

---

```
time ./hrcm compress -r $REFSEQ.fasta -t $SEQ.fasta
```

```
# Example of referential compression, using human chromosome 4 as
  reference and the corresponding gorilla chromosome as target
```

```
time ./hrcm compress -r HS_C4.fasta -t GG_C4.fasta
```

---

## References

[Silva et al.(2020)Silva, Pratas, and Pinho] Milton Silva, Diogo Pratas, and Armando J Pinho. Supporting data for "Efficient dna sequence compression with neural networks", 2020. URL <http://gigadb.org/dataset/100808>.
